# Supplementary material for: Reactive oxygen species are required for zoledronic acid-induced apoptosis in osteoclast precursors and mature osteoclast-like cells
Source: PubMed Central journal article supplement (PMC5345019; doi:10.1038/srep44245), 2017-03-10

**Reactive oxygen species are required for zoledronic acid-induced apoptosis in osteoclast precursors and mature osteoclast-like cells**

Ta-Wei Tai, Ching-Yu Chen, Fong-Chin Su, Yuan-Kun Tu, Tsung-Ting Tsai, Chiou-Feng Lin, and I-Ming Jou

Figure S1 Protein assay for Figure 2.

Figure S2 Protein assay for Figure 3.

Figure S3 Protein assay for Figure 4.

Figure S4 Protein assay for Figure 5.

Figure S5 Protein assay for Figure 6.

# Tai *et al.* Supplemental Figure 1

## For Figure 2A

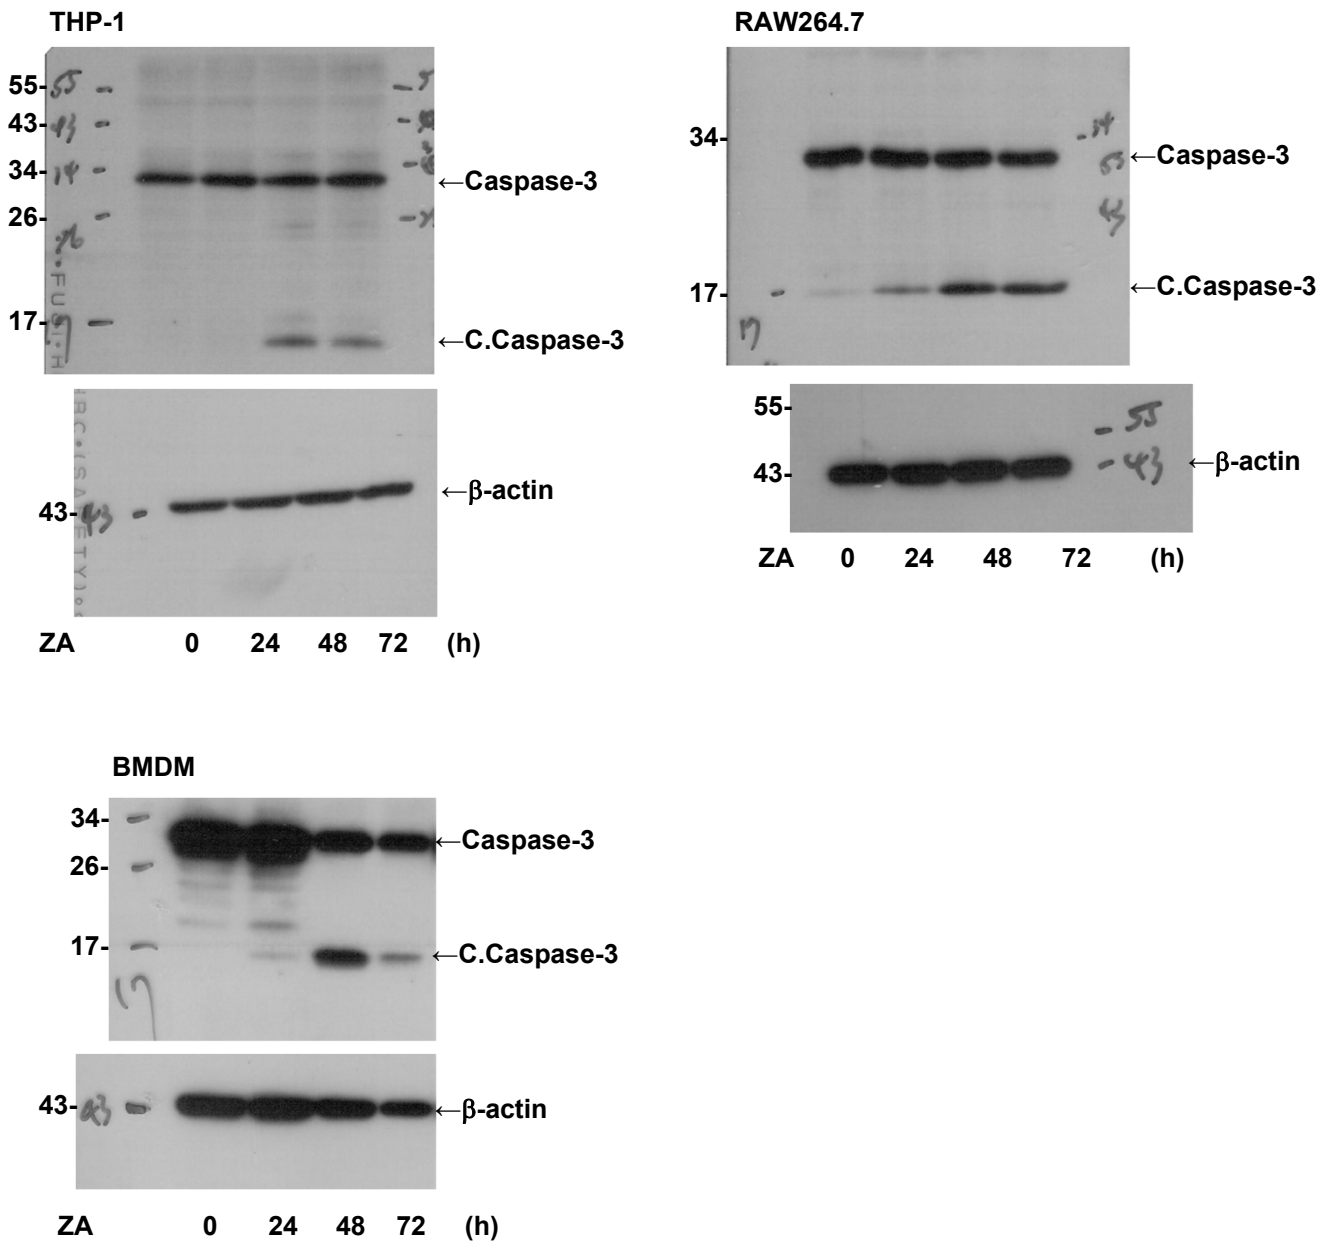

# Tai *et al.* Supplemental Figure 2

## For Figure 3C

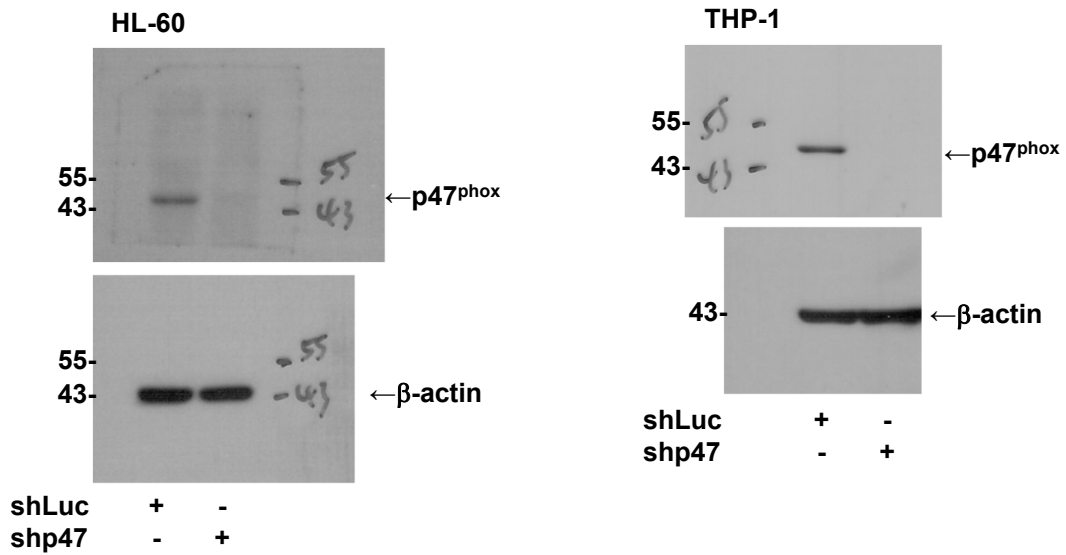

# Tai *et al.* Supplemental Figure 3

## For Figure 4A

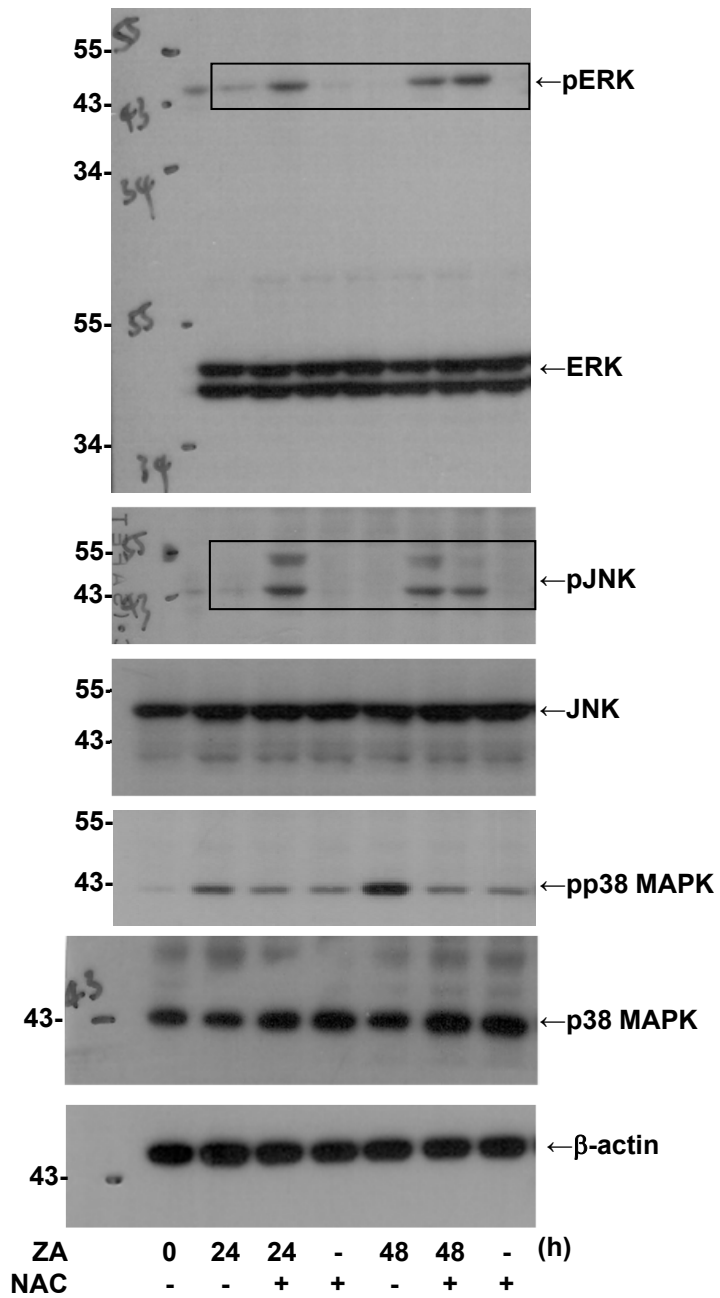

# Tai *et al.* Supplemental Figure 4

## For Figure 5A

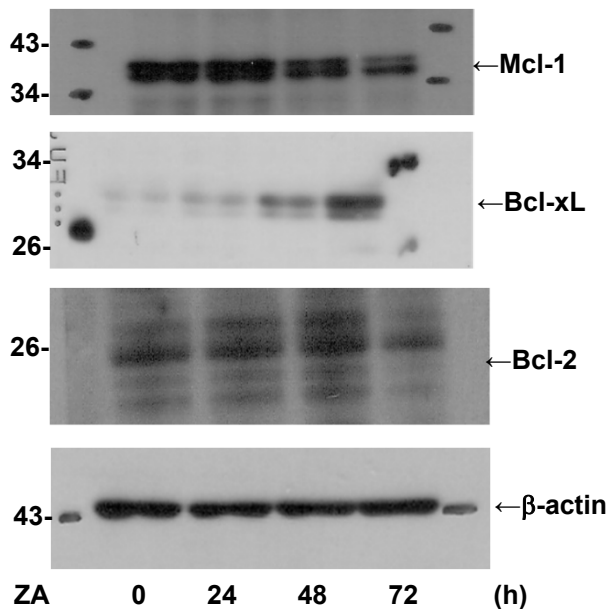

## For Figure 5C

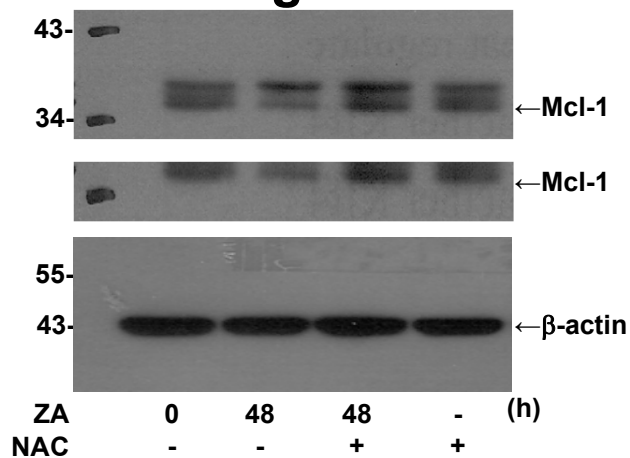

## For Figure 5D

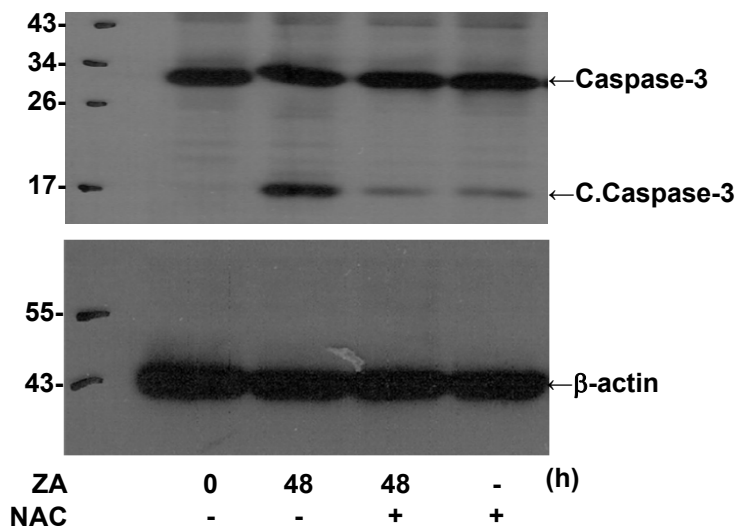

# Tai *et al.* Supplemental Figure 5

## For Figure 6A

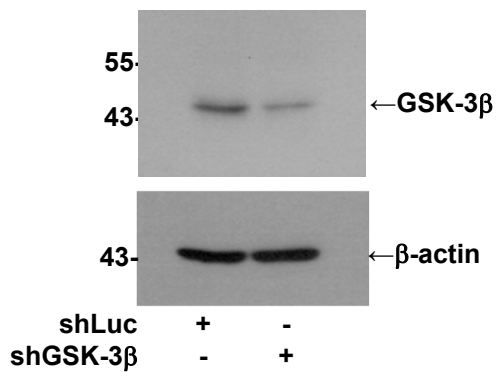

## For Figure 6C

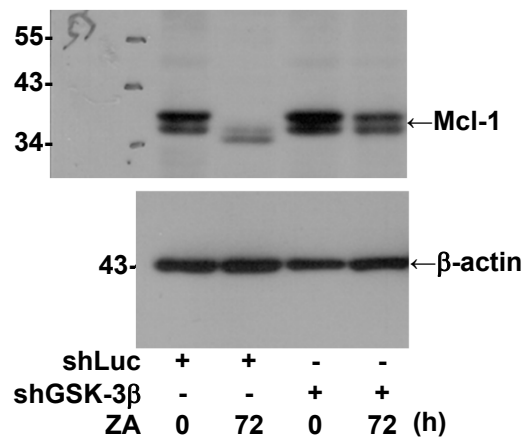

## For Figure 6D

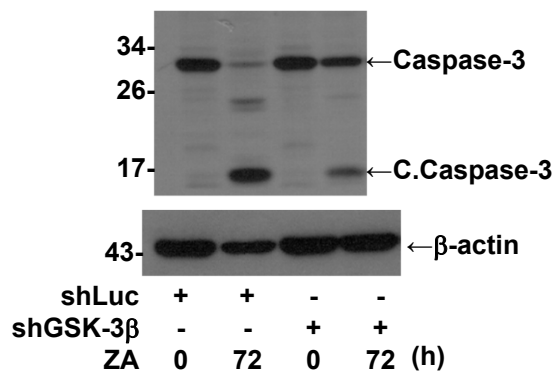

Supplement: srep44245-s1.pdf [file srep44245-s1.pdf]
